# Supplementary material for: IT-SNOW: a snow reanalysis for Italy blending modeling, in situ data, and satellite observations (2010–2021)
Source: Copernicus journal article supplement (doi:10.5194/essd-15-639-2023), 2023-02-08
Supplement: Supplementary file 1 [file essd-15-639-2023-supplement.pdf]

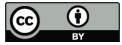

*Supplement of*

## **IT-SNOW: a snow reanalysis for Italy blending modeling, in situ data, and satellite observations (2010–2021)**

**Francesco Avanzi et al.**

*Correspondence to:* Francesco Avanzi ([francesco.avanzi@cimafoundation.org](mailto:francesco.avanzi@cimafoundation.org))

The copyright of individual parts of the supplement might differ from the article licence.

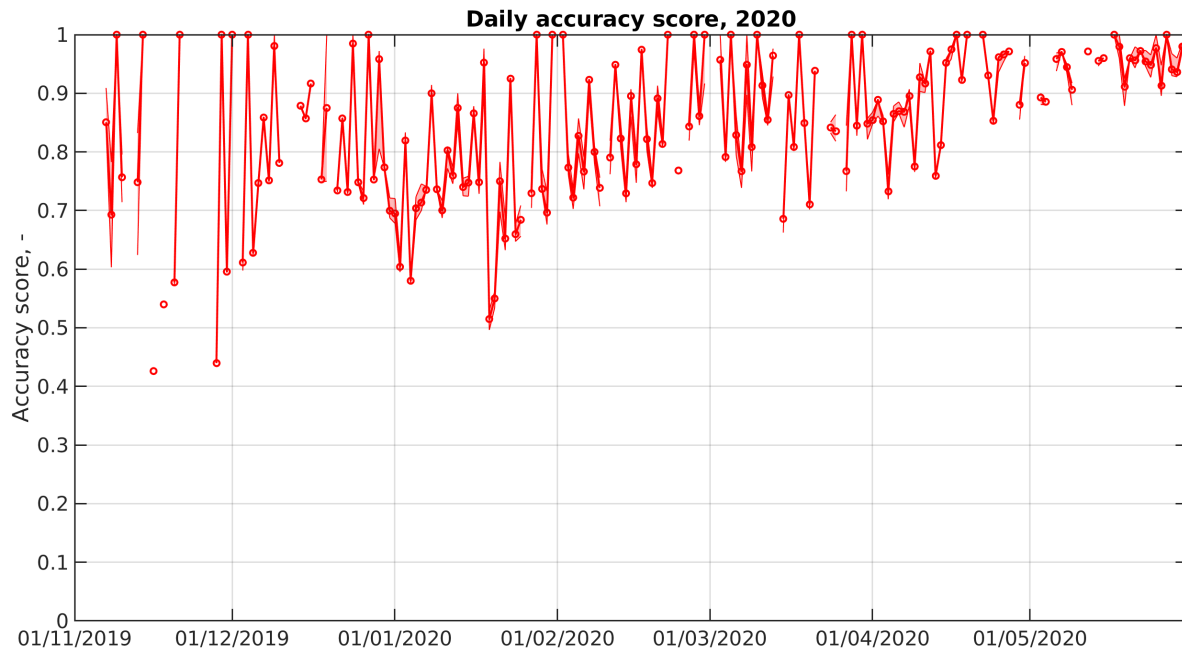

**Figure S1.** 2020 daily accuracy scores for Sen2Cor-based, daily snow-covered area maps from Sentinel-2 as employed in S3M Italy. Accuracy was computed according to Piazzini et al. (2018) as the proportion of true snow-no-snow classification over total classification. The red band represents score variability for a range of thresholds between 5 and 30 cm used to classify snow vs. no-snow conditions in in-situ snow-depth sensor data (Parajka and Blöschl, 2006; Da Ronco et al., 2020).

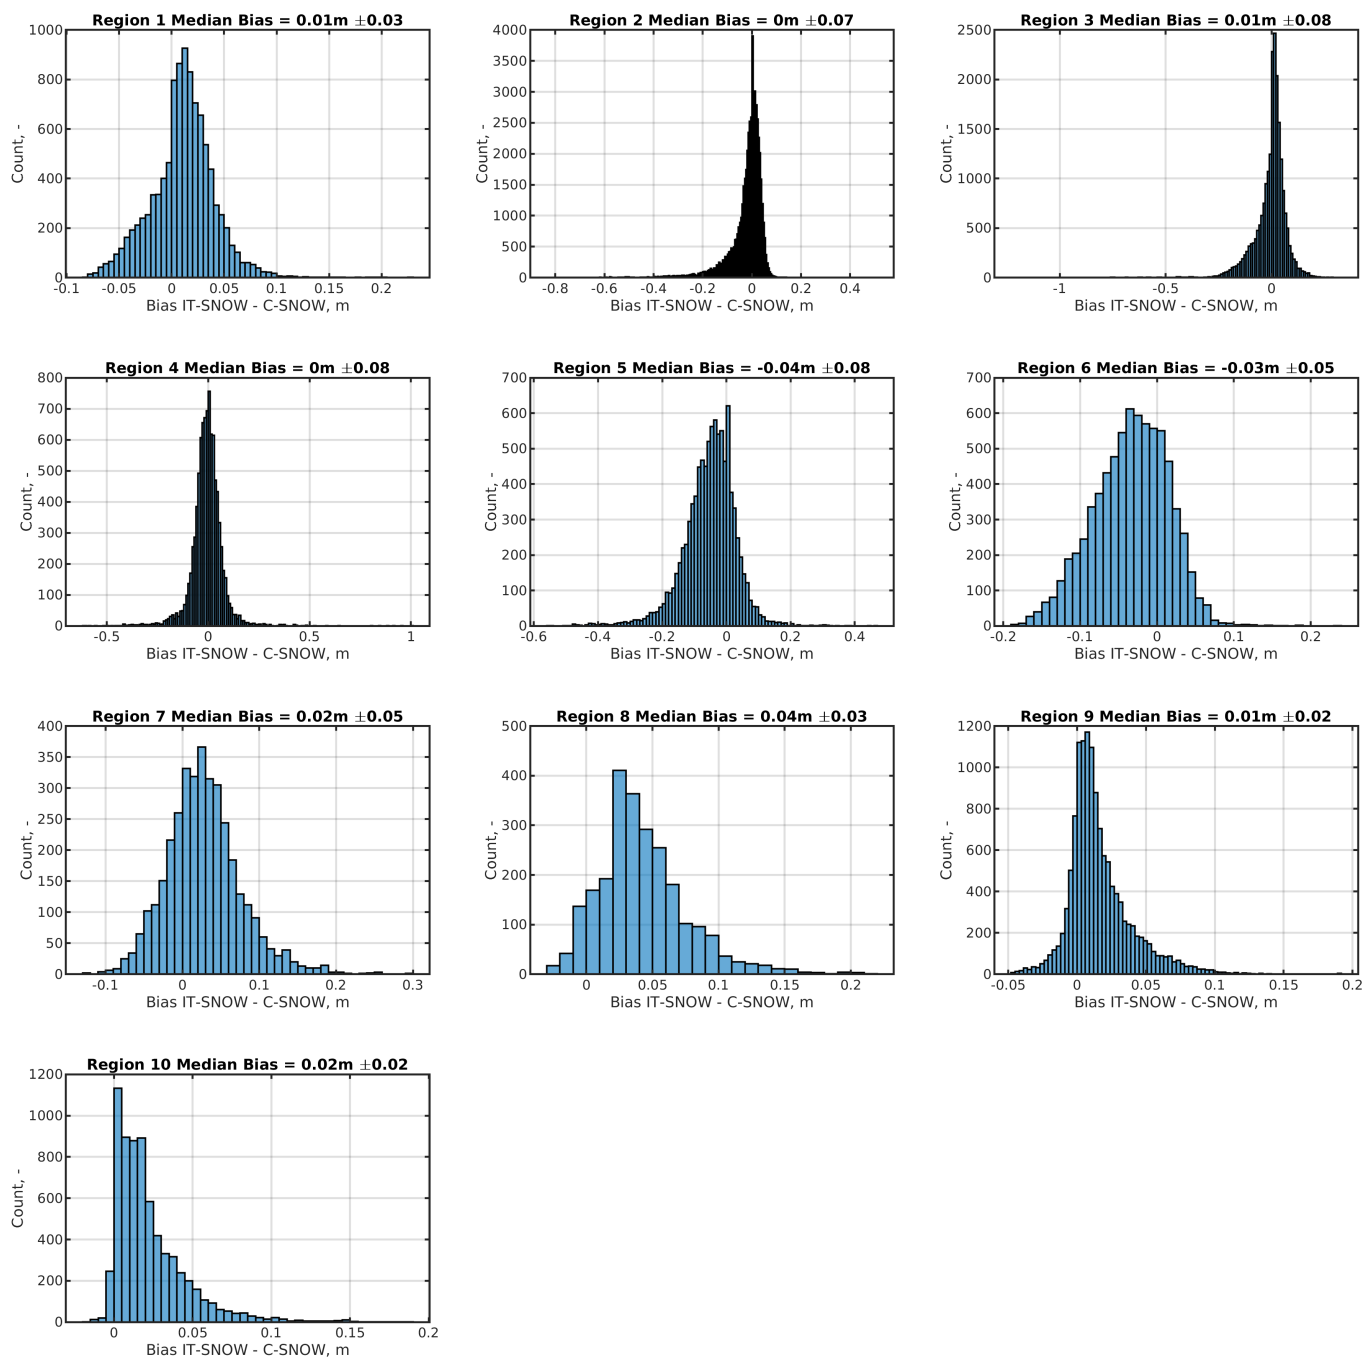

**Figure S2.** Frequency distribution of pixelwise bias between IT-SNOW snow depth and the Sentinel-1 C-SNOW dataset, aggregated by snow homogeneous regions (see Figure 4 in the main text)

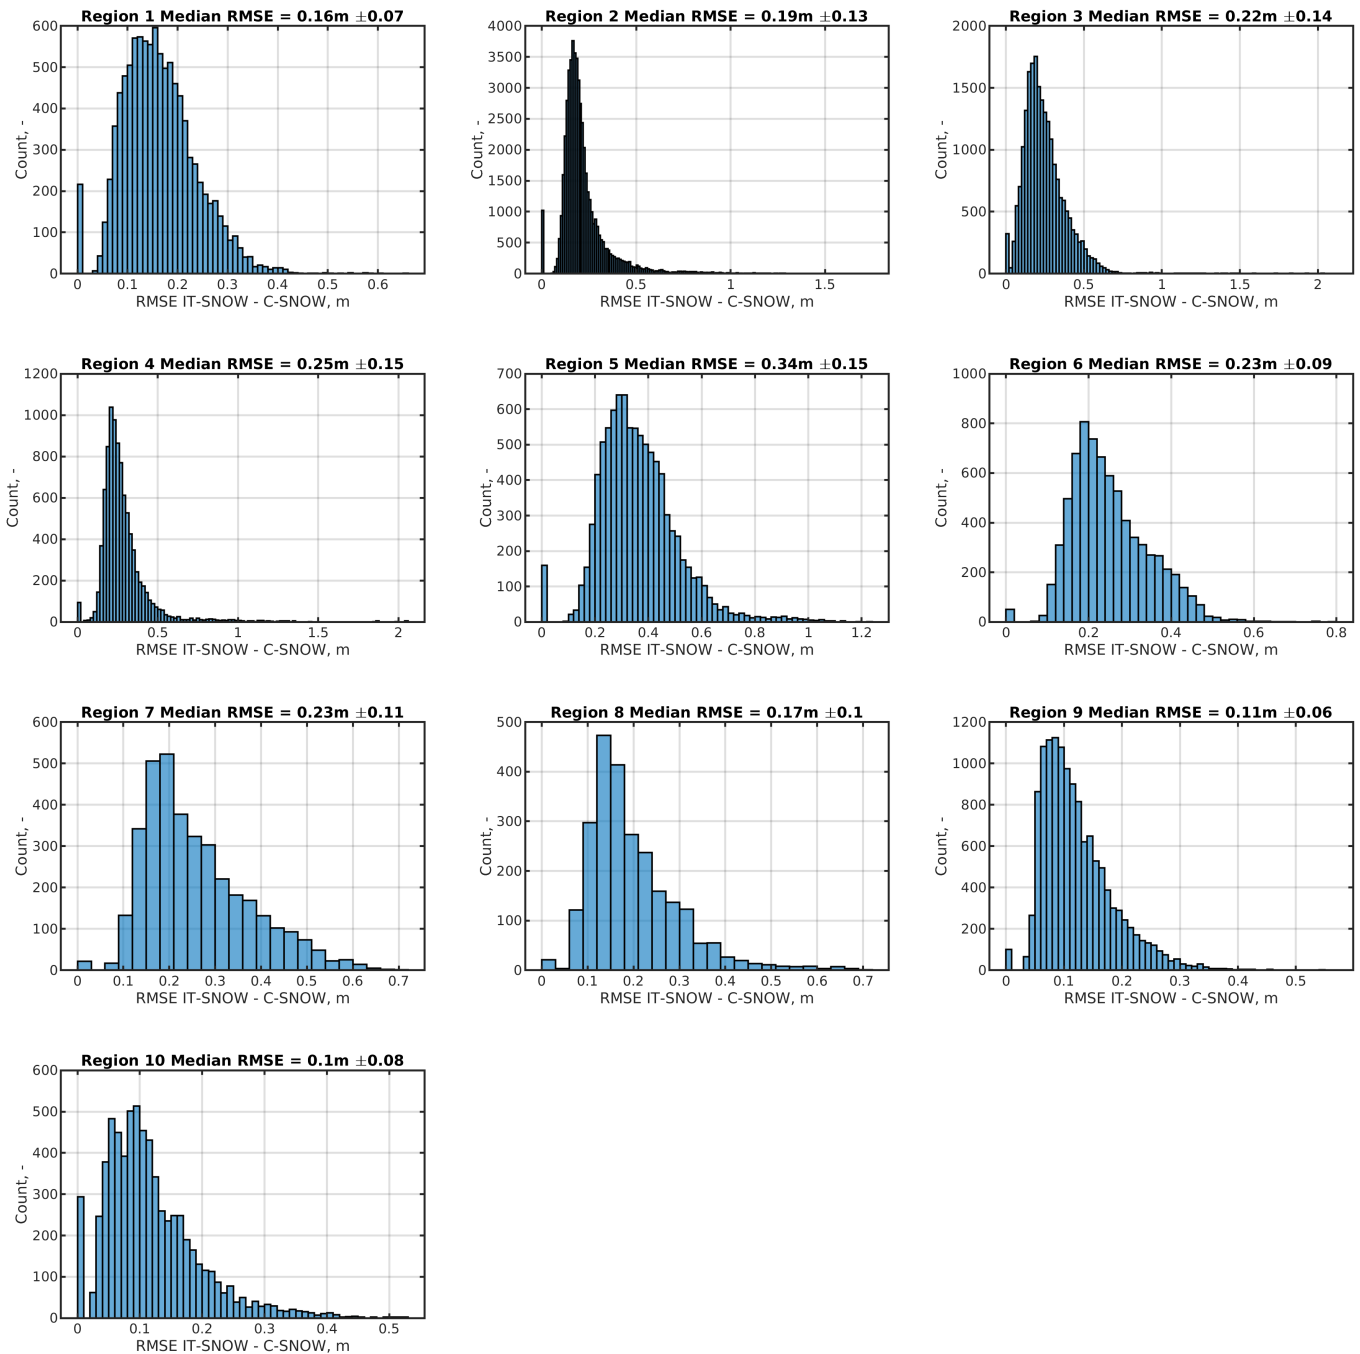

**Figure S3.** Frequency distribution of pixelwise Root Mean Square Error (RMSE) between IT-SNOW snow depth and the Sentinel-1 C-SNOW dataset, aggregated by snow homogeneous regions (see Figure 4 in the main text)

## References

- Da Ronco, P., Avanzi, F., De Michele, C., Notarnicola, C., and Schaepli, B.: Comparing MODIS snow products Collection 5 with Collection 6 over Italian Central Apennines, *International Journal of Remote Sensing*, 41, 4174–4205, <https://doi.org/10.1080/01431161.2020.1714778>, 2020.
- 5 Parajka, J. and Blöschl, G.: Validation of MODIS snow cover images over Austria, *Hydrology and Earth System Sciences*, 10, 679–689, <https://doi.org/10.5194/hess-10-679-2006>, 2006.
- Piazzì, G., Thirel, G., Campo, L., and Gabellani, S.: A particle filter scheme for multivariate data assimilation into a point-scale snowpack model in an Alpine environment, *The Cryosphere*, 12, 2287–2306, <https://doi.org/10.5194/tc-12-2287-2018>, 2018.
